# Supplementary material for: Development and evaluation of a core genome multilocus typing scheme for whole-genome sequence-based typing of Acinetobacter baumannii
Source: PubMed Central journal article supplement (PMC5464626; doi:10.1371/journal.pone.0179228), 2017-06-08
Supplement: pone.0179228.s001.pdf [file pone.0179228.s001.pdf]

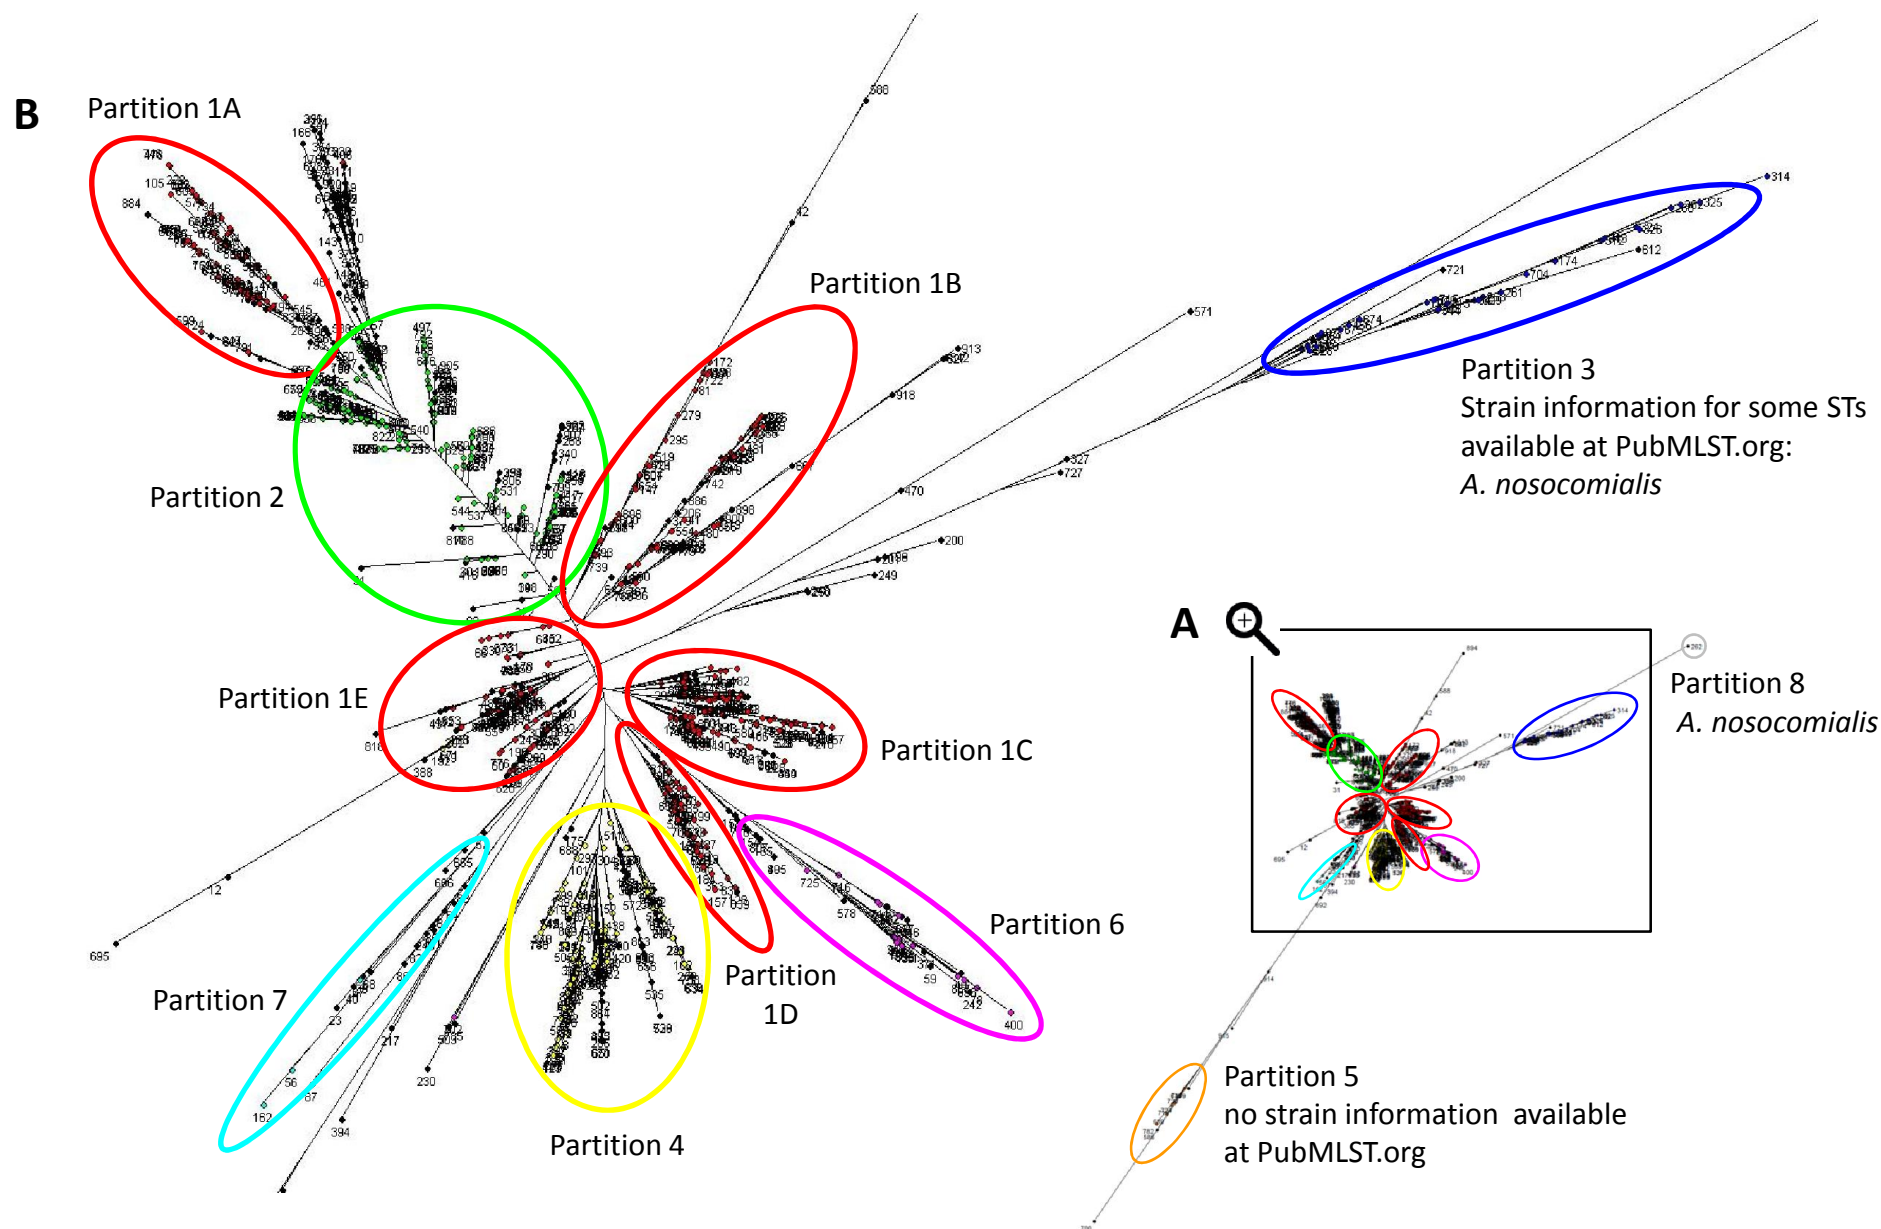

**Supp. Fig.1: Partitions as determined by BAPS mapped onto a radial phylogram generated by FastTree 2. (A) Overview and (B) Zoom into the central part of the tree. BAPS partition 1 was further subdivided manually into five subgroups (1A - 1E) according to the branching of the tree. STs that have significant admixture are colored in black.**
